# Supplementary material
Source: publisher figshare collection journal article supplement (https://acs.figshare.com/ndownloader/files/4719607)
Supplement: Supplementary file 1 [file 4719607]

 
data_bcn1042 
 
_audit_creation_method            SHELXL-97 
_chemical_name_systematic 
; 
 ? 
; 
_chemical_name_common             '[Fe(TPP)(CN)(Py)]0.4Py 0.25Py'
_chemical_melting_point           ? 
_chemical_formula_moiety          'C50 H33 Fe N6, 0.4(C5 H5 N), 0.25(C5 H5 N)'
_chemical_formula_sum 
 'C53.25 H36.25 Fe N6.65' 
_chemical_formula_weight          825.09 
 
loop_ 
 _atom_type_symbol 
 _atom_type_description 
 _atom_type_scat_dispersion_real 
 _atom_type_scat_dispersion_imag 
 _atom_type_scat_source 
 'C'  'C'   0.0033   0.0016 
 'International Tables Vol C Tables 4.2.6.8 and 6.1.1.4' 
 'H'  'H'   0.0000   0.0000 
 'International Tables Vol C Tables 4.2.6.8 and 6.1.1.4' 
 'N'  'N'   0.0061   0.0033 
 'International Tables Vol C Tables 4.2.6.8 and 6.1.1.4' 
 'Fe'  'Fe'   0.3463   0.8444 
 'International Tables Vol C Tables 4.2.6.8 and 6.1.1.4' 
 
_symmetry_cell_setting            monoclinic 
_symmetry_space_group_name_H-M    P21/n
_space_group_name_Hall            '-P 2yn'
_space_group_IT_number            14
 
loop_ 
 _symmetry_equiv_pos_as_xyz 
 'x, y, z' 
 '-x+1/2, y+1/2, -z+1/2' 
 '-x, -y, -z' 
 'x-1/2, -y-1/2, z-1/2' 
 
_cell_length_a                    13.1214(2) 
_cell_length_b                    23.5538(4) 
_cell_length_c                    14.0324(2) 
_cell_angle_alpha                 90.00 
_cell_angle_beta                  102.6060(10) 
_cell_angle_gamma                 90.00 
_cell_volume                      4232.29(11) 
_cell_formula_units_Z             4 
_cell_measurement_temperature     100(2) 
_cell_measurement_reflns_used     8437 
_cell_measurement_theta_min       2.28 
_cell_measurement_theta_max       42.00 
 
_exptl_crystal_description        block 
_exptl_crystal_colour             black
_exptl_crystal_size_max           0.55 
_exptl_crystal_size_mid           0.53 
_exptl_crystal_size_min           0.40 
_exptl_crystal_density_meas       ? 
_exptl_crystal_density_diffrn     1.295 
_exptl_crystal_density_method     'not measured' 
_exptl_crystal_F_000              1713 
_exptl_absorpt_coefficient_mu     0.402 
_exptl_absorpt_correction_type    multi-scan
_exptl_absorpt_correction_T_min   0.8091 
_exptl_absorpt_correction_T_max   0.8557 
_exptl_absorpt_process_details    '(SADABS; Sheldrick, 1996)'
 
_exptl_special_details 
; 
 ? 
; 
 
_diffrn_ambient_temperature       100(2) 
_diffrn_radiation_wavelength      0.71073 
_diffrn_radiation_type            MoK\a 
_diffrn_radiation_source          'fine-focus sealed tube' 
_diffrn_radiation_monochromator   graphite 
_diffrn_measurement_device_type   'Bruker Smart Apex CCD area detector' 
_diffrn_measurement_method        '\f and \w scans' 
_diffrn_detector_area_resol_mean  ? 
_diffrn_standards_number          ? 
_diffrn_standards_interval_count  ? 
_diffrn_standards_interval_time   ? 
_diffrn_standards_decay_%         ? 
_diffrn_reflns_number             48079 
_diffrn_reflns_av_R_equivalents   0.0221 
_diffrn_reflns_av_sigmaI/netI     0.0167 
_diffrn_reflns_limit_h_min        -16 
_diffrn_reflns_limit_h_max        16 
_diffrn_reflns_limit_k_min        -29 
_diffrn_reflns_limit_k_max        29 
_diffrn_reflns_limit_l_min        -15 
_diffrn_reflns_limit_l_max        17 
_diffrn_reflns_theta_min          2.11 
_diffrn_reflns_theta_max          26.00 
_reflns_number_total              8310 
_reflns_number_gt                 7789 
_reflns_threshold_expression      >2sigma(I) 
 
_computing_data_collection        'Brucker APEX2' 
_computing_cell_refinement        'Brucker APEX2/SAINT'
_computing_data_reduction         'Brucker SAINT/SHELXTL' 
_computing_structure_solution     'SHELXS-97 (Sheldrick, 1990)' 
_computing_structure_refinement   'SHELXL-97 (Sheldrick, 1997)' 
_computing_molecular_graphics     'Ortep3'
_computing_publication_material   'SHELXL-97'  
 
_refine_special_details 
; 
 Refinement of F^2^ against ALL reflections.  The weighted R-factor wR and 
 goodness of fit S are based on F^2^, conventional R-factors R are based 
 on F, with F set to zero for negative F^2^. The threshold expression of 
 F^2^ > 2sigma(F^2^) is used only for calculating R-factors(gt) etc. and is 
 not relevant to the choice of reflections for refinement.  R-factors based 
 on F^2^ are statistically about twice as large as those based on F, and R- 
 factors based on ALL data will be even larger. 
; 
 
_refine_ls_structure_factor_coef  Fsqd  
_refine_ls_matrix_type            full 
_refine_ls_weighting_scheme       calc  
_refine_ls_weighting_details 
 'calc w=1/[\s^2^(Fo^2^)+(0.0856P)^2^+7.1952P] where P=(Fo^2^+2Fc^2^)/3' 
_atom_sites_solution_primary      direct 
_atom_sites_solution_secondary    difmap 
_atom_sites_solution_hydrogens    geom 
_refine_ls_hydrogen_treatment     constr 
_refine_ls_extinction_method      none 
_refine_ls_extinction_coef        ? 
_refine_ls_number_reflns          8310 
_refine_ls_number_parameters      583 
_refine_ls_number_restraints      173 
_refine_ls_R_factor_all           0.0543 
_refine_ls_R_factor_gt            0.0515 
_refine_ls_wR_factor_ref          0.1531 
_refine_ls_wR_factor_gt           0.1511 
_refine_ls_goodness_of_fit_ref    1.044 
_refine_ls_restrained_S_all       1.087 
_refine_ls_shift/su_max           0.001 
_refine_ls_shift/su_mean          0.000 
 
loop_ 
 _atom_site_label 
 _atom_site_type_symbol 
 _atom_site_fract_x 
 _atom_site_fract_y 
 _atom_site_fract_z 
 _atom_site_U_iso_or_equiv 
 _atom_site_adp_type 
 _atom_site_occupancy 
 _atom_site_symmetry_multiplicity 
 _atom_site_calc_flag 
 _atom_site_refinement_flags 
 _atom_site_disorder_assembly 
 _atom_site_disorder_group 
Fe1 Fe 0.65769(2) 0.198791(13) 0.88166(2) 0.01411(12) Uani 1 1 d . . . 
N1 N 0.76691(15) 0.22118(8) 0.81296(14) 0.0164(4) Uani 1 1 d . . . 
N2 N 0.56883(15) 0.26340(8) 0.82145(15) 0.0176(4) Uani 1 1 d . . . 
N3 N 0.54834(15) 0.17632(8) 0.95108(14) 0.0162(4) Uani 1 1 d . . . 
N4 N 0.74838(15) 0.13625(8) 0.94467(14) 0.0160(4) Uani 1 1 d . . . 
N5 N 0.57302(18) 0.12149(10) 0.70487(17) 0.0279(5) Uani 1 1 d . . . 
N6 N 0.72526(16) 0.25307(9) 0.99390(15) 0.0195(4) Uani 1 1 d . . . 
C(A1 C 0.84814(18) 0.18812(10) 0.79687(17) 0.0175(5) Uani 1 1 d . . . 
C(A2 C 0.77011(18) 0.27041(10) 0.76150(17) 0.0185(5) Uani 1 1 d . . . 
C(A3 C 0.60194(19) 0.30969(10) 0.77640(18) 0.0188(5) Uani 1 1 d . . . 
C(A4 C 0.46737(19) 0.27516(10) 0.82747(18) 0.0195(5) Uani 1 1 d . . . 
C(A5 C 0.44636(19) 0.19530(10) 0.93390(18) 0.0187(5) Uani 1 1 d . . . 
C(A6 C 0.55507(18) 0.13350(10) 1.01965(17) 0.0169(5) Uani 1 1 d . . . 
C(A7 C 0.73485(18) 0.10378(10) 1.02285(17) 0.0165(4) Uani 1 1 d . . . 
C(A8 C 0.84013(18) 0.11777(10) 0.92293(17) 0.0167(5) Uani 1 1 d . . . 
C(B1 C 0.89963(19) 0.21654(11) 0.72998(19) 0.0224(5) Uani 1 1 d . . . 
H(B1 H 0.9550 0.2018 0.7036 0.027 Uiso 1 1 calc R . . 
C(B2 C 0.85464(19) 0.26806(11) 0.71162(19) 0.0227(5) Uani 1 1 d . . . 
H(B2 H 0.8750 0.2973 0.6730 0.027 Uiso 1 1 calc R . . 
C(B3 C 0.5197(2) 0.35139(11) 0.75430(19) 0.0235(5) Uani 1 1 d . . . 
H(B3 H 0.5234 0.3873 0.7244 0.028 Uiso 1 1 calc R . . 
C(B4 C 0.4367(2) 0.32991(11) 0.7840(2) 0.0238(5) Uani 1 1 d . . . 
H(B4 H 0.3704 0.3475 0.7776 0.029 Uiso 1 1 calc R . . 
C(B5 C 0.38844(19) 0.16244(10) 0.99017(18) 0.0206(5) Uani 1 1 d . . . 
H(B5 H 0.3162 0.1661 0.9895 0.025 Uiso 1 1 calc R . . 
C(B6 C 0.45585(19) 0.12531(10) 1.04431(18) 0.0191(5) Uani 1 1 d . . . 
H(B6 H 0.4402 0.0988 1.0901 0.023 Uiso 1 1 calc R . . 
C(B7 C 0.82364(19) 0.06726(10) 1.05434(17) 0.0187(5) Uani 1 1 d . . . 
H(B7 H 0.8351 0.0423 1.1088 0.022 Uiso 1 1 calc R . . 
C(B8 C 0.88755(18) 0.07512(10) 0.99208(18) 0.0183(5) Uani 1 1 d . . . 
H(B8 H 0.9517 0.0561 0.9936 0.022 Uiso 1 1 calc R . . 
C(M1 C 0.69851(19) 0.31481(10) 0.75120(18) 0.0193(5) Uani 1 1 d . . . 
C(M2 C 0.40683(19) 0.24235(10) 0.87656(18) 0.0200(5) Uani 1 1 d . . . 
C(M3 C 0.64404(19) 0.10126(10) 1.05822(17) 0.0173(5) Uani 1 1 d . . . 
C(M4 C 0.88380(18) 0.13854(10) 0.84762(18) 0.0179(5) Uani 1 1 d . . . 
C1 C 0.72670(19) 0.36998(10) 0.71031(19) 0.0208(5) Uani 1 1 d . . . 
C2 C 0.6826(2) 0.38709(11) 0.61553(19) 0.0240(5) Uani 1 1 d . . . 
H2A H 0.6334 0.3633 0.5743 0.029 Uiso 1 1 calc R . . 
C3 C 0.7103(2) 0.43909(11) 0.5808(2) 0.0269(6) Uani 1 1 d . . . 
H3A H 0.6800 0.4506 0.5159 0.032 Uiso 1 1 calc R . . 
C4 C 0.7817(2) 0.47396(11) 0.6404(2) 0.0278(6) Uani 1 1 d . . . 
H4A H 0.7997 0.5096 0.6168 0.033 Uiso 1 1 calc R . . 
C5 C 0.8268(2) 0.45688(12) 0.7344(2) 0.0329(6) Uani 1 1 d . . . 
H5A H 0.8763 0.4807 0.7753 0.040 Uiso 1 1 calc R . . 
C6 C 0.7999(2) 0.40510(12) 0.7694(2) 0.0309(6) Uani 1 1 d . . . 
H6A H 0.8315 0.3935 0.8339 0.037 Uiso 1 1 calc R . . 
C7 C 0.2978(2) 0.26179(11) 0.8753(2) 0.0243(5) Uani 1 1 d . . . 
C8 C 0.2236(2) 0.26606(11) 0.7877(2) 0.0272(6) Uani 1 1 d . . . 
H8A H 0.2418 0.2557 0.7281 0.033 Uiso 1 1 calc R . . 
C9 C 0.1233(2) 0.28544(12) 0.7870(3) 0.0335(7) Uani 1 1 d . . . 
H9A H 0.0733 0.2882 0.7270 0.040 Uiso 1 1 calc R . . 
C10 C 0.0960(2) 0.30068(13) 0.8732(3) 0.0417(8) Uani 1 1 d . . . 
H10A H 0.0274 0.3139 0.8725 0.050 Uiso 1 1 calc R . . 
C11 C 0.1685(3) 0.29671(14) 0.9603(3) 0.0421(8) Uani 1 1 d . . . 
H11A H 0.1499 0.3072 1.0196 0.051 Uiso 1 1 calc R . . 
C12 C 0.2692(2) 0.27732(13) 0.9613(2) 0.0338(6) Uani 1 1 d . . . 
H12A H 0.3188 0.2747 1.0216 0.041 Uiso 1 1 calc R . . 
C13 C 0.63550(18) 0.05871(10) 1.13572(17) 0.0177(5) Uani 1 1 d . . . 
C14 C 0.6034(2) 0.00332(11) 1.11029(19) 0.0222(5) Uani 1 1 d . . . 
H14A H 0.5952 -0.0089 1.0445 0.027 Uiso 1 1 calc R . . 
C15 C 0.5833(2) -0.03424(11) 1.1805(2) 0.0248(5) Uani 1 1 d . . . 
H15A H 0.5597 -0.0716 1.1623 0.030 Uiso 1 1 calc R . . 
C16 C 0.5977(2) -0.01712(11) 1.2768(2) 0.0267(6) Uani 1 1 d . . . 
H16A H 0.5830 -0.0426 1.3246 0.032 Uiso 1 1 calc R . . 
C17 C 0.6334(2) 0.03716(12) 1.3035(2) 0.0298(6) Uani 1 1 d . . . 
H17A H 0.6449 0.0486 1.3699 0.036 Uiso 1 1 calc R . . 
C18 C 0.6524(2) 0.07493(11) 1.23300(19) 0.0258(5) Uani 1 1 d . . . 
H18A H 0.6771 0.1121 1.2517 0.031 Uiso 1 1 calc R . . 
C19 C 0.97368(19) 0.10734(10) 0.82327(17) 0.0193(5) Uani 1 1 d . . . 
C20 C 0.9571(2) 0.05294(11) 0.7831(2) 0.0250(5) Uani 1 1 d . . . 
H20A H 0.8903 0.0357 0.7750 0.030 Uiso 1 1 calc R . . 
C21 C 1.0381(2) 0.02394(12) 0.7548(2) 0.0286(6) Uani 1 1 d . . . 
H21A H 1.0260 -0.0128 0.7266 0.034 Uiso 1 1 calc R . . 
C22 C 1.1365(2) 0.04833(12) 0.7677(2) 0.0271(6) Uani 1 1 d . . . 
H22A H 1.1915 0.0286 0.7478 0.033 Uiso 1 1 calc R . . 
C23 C 1.1540(2) 0.10156(12) 0.80968(19) 0.0253(5) Uani 1 1 d . . . 
H23A H 1.2216 0.1180 0.8199 0.030 Uiso 1 1 calc R . . 
C24 C 1.07306(19) 0.13124(11) 0.83712(19) 0.0224(5) Uani 1 1 d . . . 
H24A H 1.0857 0.1679 0.8654 0.027 Uiso 1 1 calc R . . 
C25 C 0.60222(18) 0.14984(10) 0.77263(18) 0.0190(5) Uani 1 1 d . . . 
C26 C 0.6699(2) 0.29375(11) 1.0266(2) 0.0263(6) Uani 1 1 d . . . 
H26A H 0.5963 0.2945 1.0032 0.032 Uiso 1 1 calc R . . 
C27 C 0.7161(3) 0.33480(13) 1.0934(2) 0.0357(7) Uani 1 1 d . . . 
H27A H 0.6748 0.3632 1.1149 0.043 Uiso 1 1 calc R . . 
C28 C 0.8228(3) 0.33371(13) 1.1279(2) 0.0365(7) Uani 1 1 d . . . 
H28A H 0.8562 0.3616 1.1729 0.044 Uiso 1 1 calc R . . 
C29 C 0.8805(2) 0.29148(13) 1.0962(2) 0.0315(6) Uani 1 1 d . . . 
H29A H 0.9540 0.2894 1.1198 0.038 Uiso 1 1 calc R . . 
C30 C 0.8294(2) 0.25225(11) 1.02929(19) 0.0237(5) Uani 1 1 d . . . 
H30A H 0.8694 0.2234 1.0073 0.028 Uiso 1 1 calc R . . 
N7 N 0.9800(7) 0.0313(6) 0.4954(7) 0.104(3) Uani 0.40 1 d PGU . . 
C32 C 0.9417(9) -0.0206(5) 0.5097(8) 0.123(4) Uani 0.40 1 d PGU . . 
H32 H 0.9812 -0.0533 0.5016 0.148 Uiso 0.40 1 calc PR . . 
C33 C 0.8463(10) -0.0274(4) 0.5358(9) 0.114(4) Uani 0.40 1 d PGU . . 
H43A H 0.8218 -0.0644 0.5461 0.137 Uiso 0.40 1 calc PR . . 
C34 C 0.7873(7) 0.0196(6) 0.5467(7) 0.113(3) Uani 0.40 1 d PGU . . 
H44A H 0.7209 0.0156 0.5625 0.136 Uiso 0.40 1 calc PR . . 
C35 C 0.8270(9) 0.0730(5) 0.5341(8) 0.106(3) Uani 0.40 1 d PGU . . 
H35 H 0.7893 0.1063 0.5433 0.128 Uiso 0.40 1 calc PR . . 
C36 C 0.9220(9) 0.0769(5) 0.5081(7) 0.130(4) Uani 0.40 1 d PGU . . 
H46 H 0.9482 0.1136 0.4986 0.156 Uiso 0.40 1 calc PR . . 
N8 N 0.4947(8) 0.0747(4) 0.4971(6) 0.0705(12) Uani 0.25 1 d PDU . . 
C31 C 0.5814(8) 0.0379(4) 0.5444(6) 0.0686(14) Uani 0.25 1 d PDU . . 
H31 H 0.6423 0.0533 0.5856 0.082 Uiso 0.25 1 calc PR . . 
C37 C 0.4292(9) 0.0256(4) 0.4749(8) 0.0875(15) Uani 0.25 1 d PDU . . 
H37 H 0.3600 0.0391 0.4697 0.105 Uiso 0.25 1 calc PR . . 
C39 C 0.4947(8) 0.0747(4) 0.4971(6) 0.0705(12) Uani 0.25 1 d PU . . 
H39 H 0.4857 0.1144 0.4860 0.085 Uiso 0.25 1 calc PR . . 
C40 C 0.5814(8) 0.0379(4) 0.5444(6) 0.0686(14) Uani 0.25 1 d PU . . 
H40 H 0.6423 0.0533 0.5856 0.082 Uiso 0.25 1 calc PR . . 
C38 C 0.4292(9) 0.0256(4) 0.4749(8) 0.0875(15) Uani 0.25 1 d PU . . 
H38 H 0.3600 0.0391 0.4697 0.105 Uiso 0.25 1 calc PR . . 
 
loop_ 
 _atom_site_aniso_label 
 _atom_site_aniso_U_11 
 _atom_site_aniso_U_22 
 _atom_site_aniso_U_33 
 _atom_site_aniso_U_23 
 _atom_site_aniso_U_13 
 _atom_site_aniso_U_12 
Fe1 0.01323(19) 0.01180(19) 0.01713(19) 0.00166(11) 0.00298(13) 0.00023(11) 
N1 0.0144(9) 0.0147(9) 0.0194(9) 0.0024(7) 0.0019(7) 0.0006(7) 
N2 0.0164(9) 0.0149(9) 0.0213(10) 0.0021(8) 0.0039(8) 0.0002(7) 
N3 0.0160(9) 0.0137(9) 0.0189(9) 0.0013(7) 0.0039(7) 0.0013(7) 
N4 0.0152(9) 0.0138(9) 0.0188(9) 0.0016(7) 0.0035(7) -0.0012(7) 
N5 0.0256(11) 0.0270(12) 0.0289(12) -0.0047(10) 0.0013(9) -0.0035(9) 
N6 0.0220(10) 0.0158(10) 0.0208(10) 0.0022(8) 0.0046(8) -0.0016(8) 
C(A1 0.0156(11) 0.0171(11) 0.0198(11) 0.0011(9) 0.0038(9) 0.0000(9) 
C(A2 0.0176(11) 0.0173(11) 0.0200(11) 0.0032(9) 0.0027(9) -0.0026(9) 
C(A3 0.0198(12) 0.0144(11) 0.0215(12) 0.0027(9) 0.0031(9) 0.0006(9) 
C(A4 0.0177(11) 0.0167(12) 0.0236(12) 0.0015(9) 0.0033(9) 0.0033(9) 
C(A5 0.0172(11) 0.0173(11) 0.0222(12) -0.0017(9) 0.0054(9) 0.0003(9) 
C(A6 0.0195(11) 0.0133(11) 0.0186(11) -0.0009(8) 0.0055(9) -0.0016(9) 
C(A7 0.0190(11) 0.0120(10) 0.0177(11) 0.0006(8) 0.0023(9) -0.0009(9) 
C(A8 0.0153(10) 0.0132(11) 0.0210(11) 0.0002(9) 0.0028(9) -0.0001(8) 
C(B1 0.0185(11) 0.0243(13) 0.0256(12) 0.0071(10) 0.0078(10) 0.0030(10) 
C(B2 0.0193(12) 0.0234(12) 0.0259(12) 0.0087(10) 0.0067(10) 0.0013(10) 
C(B3 0.0233(12) 0.0159(11) 0.0317(13) 0.0067(10) 0.0065(10) 0.0040(10) 
C(B4 0.0195(12) 0.0190(12) 0.0333(14) 0.0058(10) 0.0065(10) 0.0049(10) 
C(B5 0.0188(11) 0.0187(12) 0.0259(12) -0.0001(9) 0.0083(9) 0.0009(9) 
C(B6 0.0206(12) 0.0160(11) 0.0224(11) -0.0002(9) 0.0087(9) -0.0010(9) 
C(B7 0.0193(11) 0.0149(11) 0.0207(11) 0.0018(9) 0.0020(9) 0.0003(9) 
C(B8 0.0165(11) 0.0135(11) 0.0240(12) 0.0011(9) 0.0028(9) 0.0013(9) 
C(M1 0.0193(11) 0.0164(11) 0.0213(11) 0.0045(9) 0.0026(9) 0.0002(9) 
C(M2 0.0172(11) 0.0177(11) 0.0250(12) 0.0003(9) 0.0045(9) 0.0019(9) 
C(M3 0.0210(11) 0.0129(11) 0.0180(11) 0.0001(9) 0.0040(9) -0.0005(9) 
C(M4 0.0156(11) 0.0160(11) 0.0217(11) 0.0008(9) 0.0035(9) -0.0003(9) 
C1 0.0173(11) 0.0169(11) 0.0294(13) 0.0060(10) 0.0076(10) 0.0028(9) 
C2 0.0265(13) 0.0184(12) 0.0280(13) 0.0032(10) 0.0081(10) 0.0035(10) 
C3 0.0332(14) 0.0203(13) 0.0298(13) 0.0082(10) 0.0130(11) 0.0067(11) 
C4 0.0260(13) 0.0178(12) 0.0438(16) 0.0091(11) 0.0164(12) 0.0028(10) 
C5 0.0265(14) 0.0242(14) 0.0457(17) 0.0060(12) 0.0027(12) -0.0069(11) 
C6 0.0269(14) 0.0273(14) 0.0354(15) 0.0104(11) -0.0001(11) -0.0045(11) 
C7 0.0197(12) 0.0176(12) 0.0372(14) 0.0067(10) 0.0095(10) 0.0032(9) 
C8 0.0207(12) 0.0192(12) 0.0417(15) 0.0069(11) 0.0066(11) 0.0003(10) 
C9 0.0201(13) 0.0228(13) 0.0568(19) 0.0118(13) 0.0064(12) 0.0010(11) 
C10 0.0255(15) 0.0294(16) 0.074(2) 0.0140(15) 0.0201(16) 0.0103(12) 
C11 0.0405(18) 0.0369(17) 0.056(2) 0.0043(14) 0.0266(16) 0.0118(14) 
C12 0.0327(15) 0.0309(15) 0.0408(16) 0.0042(12) 0.0144(13) 0.0082(12) 
C13 0.0165(11) 0.0159(11) 0.0219(11) 0.0032(9) 0.0066(9) 0.0018(9) 
C14 0.0231(12) 0.0187(12) 0.0246(12) 0.0015(10) 0.0051(10) 0.0003(9) 
C15 0.0251(13) 0.0166(12) 0.0335(14) 0.0047(10) 0.0079(11) -0.0007(10) 
C16 0.0292(13) 0.0226(13) 0.0319(14) 0.0113(11) 0.0147(11) 0.0052(10) 
C17 0.0430(16) 0.0267(14) 0.0224(13) 0.0022(10) 0.0127(11) 0.0025(12) 
C18 0.0364(14) 0.0170(12) 0.0253(13) -0.0002(10) 0.0096(11) -0.0013(10) 
C19 0.0195(12) 0.0185(11) 0.0207(11) 0.0065(9) 0.0060(9) 0.0038(9) 
C20 0.0244(13) 0.0198(12) 0.0324(14) 0.0025(10) 0.0099(11) -0.0004(10) 
C21 0.0340(14) 0.0197(12) 0.0347(14) 0.0020(11) 0.0129(12) 0.0058(11) 
C22 0.0280(13) 0.0272(13) 0.0294(13) 0.0104(11) 0.0135(11) 0.0128(11) 
C23 0.0192(12) 0.0298(14) 0.0280(13) 0.0085(11) 0.0079(10) 0.0037(10) 
C24 0.0206(12) 0.0207(12) 0.0260(12) 0.0052(10) 0.0057(10) 0.0023(10) 
C25 0.0145(11) 0.0173(11) 0.0251(12) 0.0047(10) 0.0037(9) 0.0008(9) 
C26 0.0303(14) 0.0222(13) 0.0258(13) -0.0019(10) 0.0047(11) 0.0039(11) 
C27 0.0477(18) 0.0255(14) 0.0330(15) -0.0084(12) 0.0068(13) 0.0038(13) 
C28 0.0482(18) 0.0267(15) 0.0325(15) -0.0100(12) 0.0044(13) -0.0117(13) 
C29 0.0291(14) 0.0319(15) 0.0317(14) -0.0045(12) 0.0028(12) -0.0107(12) 
C30 0.0225(12) 0.0226(12) 0.0255(12) -0.0013(10) 0.0039(10) -0.0034(10) 
N7 0.121(6) 0.138(6) 0.046(4) -0.026(5) -0.001(5) -0.014(5) 
C32 0.135(7) 0.150(6) 0.077(6) -0.028(6) 0.004(6) -0.014(6) 
C33 0.122(6) 0.126(6) 0.085(6) -0.023(6) 0.003(5) -0.008(5) 
C34 0.132(6) 0.112(6) 0.078(6) -0.002(5) -0.016(5) -0.009(5) 
C35 0.114(6) 0.109(6) 0.076(5) 0.008(5) -0.023(5) -0.014(5) 
C36 0.137(6) 0.146(6) 0.097(6) 0.008(6) 0.003(6) -0.001(6) 
N8 0.102(3) 0.070(2) 0.044(2) -0.020(2) 0.026(2) -0.016(2) 
C31 0.102(3) 0.065(3) 0.044(2) -0.023(2) 0.027(2) -0.019(3) 
C37 0.113(3) 0.086(3) 0.064(3) -0.013(2) 0.020(2) -0.009(3) 
C39 0.102(3) 0.070(2) 0.044(2) -0.020(2) 0.026(2) -0.016(2) 
C40 0.102(3) 0.065(3) 0.044(2) -0.023(2) 0.027(2) -0.019(3) 
C38 0.113(3) 0.086(3) 0.064(3) -0.013(2) 0.020(2) -0.009(3) 
 
_geom_special_details 
; 
 All esds (except the esd in the dihedral angle between two l.s. planes) 
 are estimated using the full covariance matrix.  The cell esds are taken 
 into account individually in the estimation of esds in distances, angles 
 and torsion angles; correlations between esds in cell parameters are only 
 used when they are defined by crystal symmetry.  An approximate (isotropic) 
 treatment of cell esds is used for estimating esds involving l.s. planes. 
; 
 
loop_ 
 _geom_bond_atom_site_label_1 
 _geom_bond_atom_site_label_2 
 _geom_bond_distance 
 _geom_bond_site_symmetry_2 
 _geom_bond_publ_flag 
Fe1 C25 1.927(3) . ? 
Fe1 N1 1.966(2) . ? 
Fe1 N3 1.974(2) . ? 
Fe1 N4 1.977(2) . ? 
Fe1 N2 1.990(2) . ? 
Fe1 N6 2.072(2) . ? 
N1 C(A2 1.371(3) . ? 
N1 C(A1 1.378(3) . ? 
N2 C(A3 1.377(3) . ? 
N2 C(A4 1.380(3) . ? 
N3 C(A5 1.381(3) . ? 
N3 C(A6 1.383(3) . ? 
N4 C(A8 1.376(3) . ? 
N4 C(A7 1.380(3) . ? 
N5 C25 1.157(3) . ? 
N6 C26 1.343(3) . ? 
N6 C30 1.348(3) . ? 
C(A1 C(M4 1.394(3) . ? 
C(A1 C(B1 1.436(3) . ? 
C(A2 C(M1 1.392(3) . ? 
C(A2 C(B2 1.436(3) . ? 
C(A3 C(M1 1.393(3) . ? 
C(A3 C(B3 1.441(3) . ? 
C(A4 C(M2 1.393(3) . ? 
C(A4 C(B4 1.445(3) . ? 
C(A5 C(M2 1.401(3) . ? 
C(A5 C(B5 1.436(3) . ? 
C(A6 C(M3 1.399(3) . ? 
C(A6 C(B6 1.431(3) . ? 
C(A7 C(M3 1.389(3) . ? 
C(A7 C(B7 1.438(3) . ? 
C(A8 C(M4 1.396(3) . ? 
C(A8 C(B8 1.440(3) . ? 
C(B1 C(B2 1.349(4) . ? 
C(B1 H(B1 0.9500 . ? 
C(B2 H(B2 0.9500 . ? 
C(B3 C(B4 1.347(4) . ? 
C(B3 H(B3 0.9500 . ? 
C(B4 H(B4 0.9500 . ? 
C(B5 C(B6 1.353(4) . ? 
C(B5 H(B5 0.9500 . ? 
C(B6 H(B6 0.9500 . ? 
C(B7 C(B8 1.349(3) . ? 
C(B7 H(B7 0.9500 . ? 
C(B8 H(B8 0.9500 . ? 
C(M1 C1 1.499(3) . ? 
C(M2 C7 1.498(3) . ? 
C(M3 C13 1.501(3) . ? 
C(M4 C19 1.491(3) . ? 
C1 C2 1.389(4) . ? 
C1 C6 1.395(4) . ? 
C2 C3 1.396(4) . ? 
C2 H2A 0.9500 . ? 
C3 C4 1.382(4) . ? 
C3 H3A 0.9500 . ? 
C4 C5 1.383(4) . ? 
C4 H4A 0.9500 . ? 
C5 C6 1.389(4) . ? 
C5 H5A 0.9500 . ? 
C6 H6A 0.9500 . ? 
C7 C12 1.390(4) . ? 
C7 C8 1.395(4) . ? 
C8 C9 1.392(4) . ? 
C8 H8A 0.9500 . ? 
C9 C10 1.382(5) . ? 
C9 H9A 0.9500 . ? 
C10 C11 1.378(5) . ? 
C10 H10A 0.9500 . ? 
C11 C12 1.395(4) . ? 
C11 H11A 0.9500 . ? 
C12 H12A 0.9500 . ? 
C13 C18 1.388(4) . ? 
C13 C14 1.393(3) . ? 
C14 C15 1.391(4) . ? 
C14 H14A 0.9500 . ? 
C15 C16 1.384(4) . ? 
C15 H15A 0.9500 . ? 
C16 C17 1.385(4) . ? 
C16 H16A 0.9500 . ? 
C17 C18 1.392(4) . ? 
C17 H17A 0.9500 . ? 
C18 H18A 0.9500 . ? 
C19 C24 1.394(4) . ? 
C19 C20 1.398(4) . ? 
C20 C21 1.392(4) . ? 
C20 H20A 0.9500 . ? 
C21 C22 1.388(4) . ? 
C21 H21A 0.9500 . ? 
C22 C23 1.383(4) . ? 
C22 H22A 0.9500 . ? 
C23 C24 1.394(4) . ? 
C23 H23A 0.9500 . ? 
C24 H24A 0.9500 . ? 
C26 C27 1.391(4) . ? 
C26 H26A 0.9500 . ? 
C27 C28 1.378(5) . ? 
C27 H27A 0.9500 . ? 
C28 C29 1.382(5) . ? 
C28 H28A 0.9500 . ? 
C29 C30 1.382(4) . ? 
C29 H29A 0.9500 . ? 
C30 H30A 0.9500 . ? 
N7 C32 1.076(19) 3_756 ? 
N7 C36 1.3492 . ? 
N7 C32 1.3536 . ? 
N7 N7 1.56(3) 3_756 ? 
C32 C33 1.3873 . ? 
C32 H32 0.9500 . ? 
C33 C34 1.3799 . ? 
C33 H43A 0.9500 . ? 
C34 C35 1.3865 . ? 
C34 H44A 0.9500 . ? 
C35 C36 1.3767 . ? 
C35 H35 0.9500 . ? 
C36 H46 0.9500 . ? 
N8 C37 1.433(11) . ? 
N8 C31 1.469(12) . ? 
C31 C37 1.523(10) 3_656 ? 
C31 H31 0.9500 . ? 
C37 C31 1.523(10) 3_656 ? 
C37 H37 0.9500 . ? 
 
loop_ 
 _geom_angle_atom_site_label_1 
 _geom_angle_atom_site_label_2 
 _geom_angle_atom_site_label_3 
 _geom_angle 
 _geom_angle_site_symmetry_1 
 _geom_angle_site_symmetry_3 
 _geom_angle_publ_flag 
C25 Fe1 N1 87.74(9) . . ? 
C25 Fe1 N3 92.41(9) . . ? 
N1 Fe1 N3 179.80(9) . . ? 
C25 Fe1 N4 89.74(9) . . ? 
N1 Fe1 N4 89.26(8) . . ? 
N3 Fe1 N4 90.62(8) . . ? 
C25 Fe1 N2 92.05(9) . . ? 
N1 Fe1 N2 90.51(8) . . ? 
N3 Fe1 N2 89.60(8) . . ? 
N4 Fe1 N2 178.19(8) . . ? 
C25 Fe1 N6 176.05(9) . . ? 
N1 Fe1 N6 88.30(8) . . ? 
N3 Fe1 N6 91.54(8) . . ? 
N4 Fe1 N6 90.22(8) . . ? 
N2 Fe1 N6 87.98(8) . . ? 
C(A2 N1 C(A1 106.13(19) . . ? 
C(A2 N1 Fe1 126.47(16) . . ? 
C(A1 N1 Fe1 126.98(16) . . ? 
C(A3 N2 C(A4 105.91(19) . . ? 
C(A3 N2 Fe1 125.88(16) . . ? 
C(A4 N2 Fe1 127.67(16) . . ? 
C(A5 N3 C(A6 105.65(19) . . ? 
C(A5 N3 Fe1 127.43(16) . . ? 
C(A6 N3 Fe1 126.57(16) . . ? 
C(A8 N4 C(A7 105.76(19) . . ? 
C(A8 N4 Fe1 127.38(16) . . ? 
C(A7 N4 Fe1 126.81(16) . . ? 
C26 N6 C30 117.7(2) . . ? 
C26 N6 Fe1 121.77(18) . . ? 
C30 N6 Fe1 120.16(17) . . ? 
N1 C(A1 C(M4 125.1(2) . . ? 
N1 C(A1 C(B1 109.6(2) . . ? 
C(M4 C(A1 C(B1 124.8(2) . . ? 
N1 C(A2 C(M1 126.3(2) . . ? 
N1 C(A2 C(B2 109.9(2) . . ? 
C(M1 C(A2 C(B2 123.6(2) . . ? 
N2 C(A3 C(M1 125.5(2) . . ? 
N2 C(A3 C(B3 110.0(2) . . ? 
C(M1 C(A3 C(B3 124.4(2) . . ? 
N2 C(A4 C(M2 125.5(2) . . ? 
N2 C(A4 C(B4 109.7(2) . . ? 
C(M2 C(A4 C(B4 124.5(2) . . ? 
N3 C(A5 C(M2 125.4(2) . . ? 
N3 C(A5 C(B5 109.8(2) . . ? 
C(M2 C(A5 C(B5 124.6(2) . . ? 
N3 C(A6 C(M3 125.9(2) . . ? 
N3 C(A6 C(B6 110.1(2) . . ? 
C(M3 C(A6 C(B6 124.0(2) . . ? 
N4 C(A7 C(M3 125.2(2) . . ? 
N4 C(A7 C(B7 109.9(2) . . ? 
C(M3 C(A7 C(B7 124.4(2) . . ? 
N4 C(A8 C(M4 125.5(2) . . ? 
N4 C(A8 C(B8 110.0(2) . . ? 
C(M4 C(A8 C(B8 124.5(2) . . ? 
C(B2 C(B1 C(A1 107.2(2) . . ? 
C(B2 C(B1 H(B1 126.4 . . ? 
C(A1 C(B1 H(B1 126.4 . . ? 
C(B1 C(B2 C(A2 107.1(2) . . ? 
C(B1 C(B2 H(B2 126.5 . . ? 
C(A2 C(B2 H(B2 126.5 . . ? 
C(B4 C(B3 C(A3 107.2(2) . . ? 
C(B4 C(B3 H(B3 126.4 . . ? 
C(A3 C(B3 H(B3 126.4 . . ? 
C(B3 C(B4 C(A4 107.2(2) . . ? 
C(B3 C(B4 H(B4 126.4 . . ? 
C(A4 C(B4 H(B4 126.4 . . ? 
C(B6 C(B5 C(A5 107.3(2) . . ? 
C(B6 C(B5 H(B5 126.3 . . ? 
C(A5 C(B5 H(B5 126.3 . . ? 
C(B5 C(B6 C(A6 107.1(2) . . ? 
C(B5 C(B6 H(B6 126.4 . . ? 
C(A6 C(B6 H(B6 126.4 . . ? 
C(B8 C(B7 C(A7 107.2(2) . . ? 
C(B8 C(B7 H(B7 126.4 . . ? 
C(A7 C(B7 H(B7 126.4 . . ? 
C(B7 C(B8 C(A8 107.1(2) . . ? 
C(B7 C(B8 H(B8 126.5 . . ? 
C(A8 C(B8 H(B8 126.5 . . ? 
C(A2 C(M1 C(A3 122.6(2) . . ? 
C(A2 C(M1 C1 118.3(2) . . ? 
C(A3 C(M1 C1 119.1(2) . . ? 
C(A4 C(M2 C(A5 122.9(2) . . ? 
C(A4 C(M2 C7 118.0(2) . . ? 
C(A5 C(M2 C7 118.8(2) . . ? 
C(A7 C(M3 C(A6 123.2(2) . . ? 
C(A7 C(M3 C13 119.5(2) . . ? 
C(A6 C(M3 C13 117.1(2) . . ? 
C(A1 C(M4 C(A8 122.2(2) . . ? 
C(A1 C(M4 C19 119.3(2) . . ? 
C(A8 C(M4 C19 118.5(2) . . ? 
C2 C1 C6 119.1(2) . . ? 
C2 C1 C(M1 122.1(2) . . ? 
C6 C1 C(M1 118.8(2) . . ? 
C1 C2 C3 120.2(3) . . ? 
C1 C2 H2A 119.9 . . ? 
C3 C2 H2A 119.9 . . ? 
C4 C3 C2 120.2(3) . . ? 
C4 C3 H3A 119.9 . . ? 
C2 C3 H3A 119.9 . . ? 
C3 C4 C5 119.8(2) . . ? 
C3 C4 H4A 120.1 . . ? 
C5 C4 H4A 120.1 . . ? 
C4 C5 C6 120.2(3) . . ? 
C4 C5 H5A 119.9 . . ? 
C6 C5 H5A 119.9 . . ? 
C5 C6 C1 120.4(3) . . ? 
C5 C6 H6A 119.8 . . ? 
C1 C6 H6A 119.8 . . ? 
C12 C7 C8 118.5(3) . . ? 
C12 C7 C(M2 120.5(3) . . ? 
C8 C7 C(M2 120.9(2) . . ? 
C9 C8 C7 120.5(3) . . ? 
C9 C8 H8A 119.8 . . ? 
C7 C8 H8A 119.8 . . ? 
C10 C9 C8 120.3(3) . . ? 
C10 C9 H9A 119.9 . . ? 
C8 C9 H9A 119.9 . . ? 
C11 C10 C9 119.8(3) . . ? 
C11 C10 H10A 120.1 . . ? 
C9 C10 H10A 120.1 . . ? 
C10 C11 C12 120.1(3) . . ? 
C10 C11 H11A 120.0 . . ? 
C12 C11 H11A 120.0 . . ? 
C7 C12 C11 120.8(3) . . ? 
C7 C12 H12A 119.6 . . ? 
C11 C12 H12A 119.6 . . ? 
C18 C13 C14 119.0(2) . . ? 
C18 C13 C(M3 120.5(2) . . ? 
C14 C13 C(M3 120.4(2) . . ? 
C15 C14 C13 120.5(2) . . ? 
C15 C14 H14A 119.8 . . ? 
C13 C14 H14A 119.8 . . ? 
C16 C15 C14 120.0(2) . . ? 
C16 C15 H15A 120.0 . . ? 
C14 C15 H15A 120.0 . . ? 
C15 C16 C17 119.9(2) . . ? 
C15 C16 H16A 120.0 . . ? 
C17 C16 H16A 120.0 . . ? 
C16 C17 C18 120.0(3) . . ? 
C16 C17 H17A 120.0 . . ? 
C18 C17 H17A 120.0 . . ? 
C13 C18 C17 120.5(2) . . ? 
C13 C18 H18A 119.7 . . ? 
C17 C18 H18A 119.7 . . ? 
C24 C19 C20 119.0(2) . . ? 
C24 C19 C(M4 122.1(2) . . ? 
C20 C19 C(M4 118.9(2) . . ? 
C21 C20 C19 120.2(2) . . ? 
C21 C20 H20A 119.9 . . ? 
C19 C20 H20A 119.9 . . ? 
C22 C21 C20 120.4(3) . . ? 
C22 C21 H21A 119.8 . . ? 
C20 C21 H21A 119.8 . . ? 
C23 C22 C21 119.6(2) . . ? 
C23 C22 H22A 120.2 . . ? 
C21 C22 H22A 120.2 . . ? 
C22 C23 C24 120.5(2) . . ? 
C22 C23 H23A 119.8 . . ? 
C24 C23 H23A 119.8 . . ? 
C23 C24 C19 120.3(2) . . ? 
C23 C24 H24A 119.9 . . ? 
C19 C24 H24A 119.9 . . ? 
N5 C25 Fe1 176.4(2) . . ? 
N6 C26 C27 122.5(3) . . ? 
N6 C26 H26A 118.7 . . ? 
C27 C26 H26A 118.7 . . ? 
C28 C27 C26 119.0(3) . . ? 
C28 C27 H27A 120.5 . . ? 
C26 C27 H27A 120.5 . . ? 
C27 C28 C29 119.1(3) . . ? 
C27 C28 H28A 120.4 . . ? 
C29 C28 H28A 120.4 . . ? 
C28 C29 C30 118.8(3) . . ? 
C28 C29 H29A 120.6 . . ? 
C30 C29 H29A 120.6 . . ? 
N6 C30 C29 122.9(3) . . ? 
N6 C30 H30A 118.5 . . ? 
C29 C30 H30A 118.5 . . ? 
C32 N7 C36 140(2) 3_756 . ? 
C32 N7 C32 101(2) 3_756 . ? 
C36 N7 C32 117.4 . . ? 
C36 N7 N7 158.4(9) . 3_756 ? 
N7 C32 C33 121.9 . . ? 
N7 C32 H32 119.0 . . ? 
C33 C32 H32 119.0 . . ? 
C34 C33 C32 119.7 . . ? 
C34 C33 H43A 120.1 . . ? 
C32 C33 H43A 120.1 . . ? 
C33 C34 C35 118.7 . . ? 
C33 C34 H44A 120.7 . . ? 
C35 C34 H44A 120.7 . . ? 
C36 C35 C34 118.7 . . ? 
C36 C35 H35 120.7 . . ? 
C34 C35 H35 120.7 . . ? 
N7 C36 C35 123.5 . . ? 
N7 C36 H46 118.3 . . ? 
C35 C36 H46 118.3 . . ? 
C37 N8 C31 89.5(7) . . ? 
N8 C31 C37 117.9(9) . 3_656 ? 
N8 C31 H31 121.0 . . ? 
C37 C31 H31 121.0 3_656 . ? 
N8 C37 C31 149.2(11) . 3_656 ? 
N8 C37 H37 105.4 . . ? 
C31 C37 H37 105.4 3_656 . ? 
 
_diffrn_measured_fraction_theta_max    0.999 
_diffrn_reflns_theta_full              26.00 
_diffrn_measured_fraction_theta_full   0.999 
_refine_diff_density_max    1.581 
_refine_diff_density_min   -1.683 
_refine_diff_density_rms    0.084 
